# Supplementary material for: Traditional Chinese herbal formulas modulate gut microbiome and improve insomnia in patients with distinct syndrome types: insights from an interventional clinical study
Source: PubMed Central journal article supplement (PMC11137223; doi:10.3389/fcimb.2024.1395267), 2024-05-16
Supplement: DataSheet_1.pdf [file DataSheet_1.pdf]

## *Supplementary Material*

### 1 **1 Supplementary methods**

#### 2 *Standard production process of the decocting-free granules of two herbal formulas*

#### 3 **1.1 The STYHCD herbal formula**

4 The STYHCD herbal formula is composed of ten different herbs, as detailed in Supplementary Table  
5 S1. The primary components of each herb were extracted following the specified processing procedures  
6 outlined below. Subsequently, these ten extracts were thoroughly mixed for 30 minutes to achieve  
7 uniformity. The homogenized mixture was then granulated to produce granules with a size range of  
8 12-40 mesh. Finally, the granules were packaged into four aluminum foil bags.

##### 9 **1.1.1 Bupleurum chinense DC.**

10 Decoct the pieces with water twice, first for 2 hours and second for 1 hour. 2. Combine the decoctions,  
11 filter, and concentrate the filtrate to a clear paste with a relative density of 1.10 to 1.12 ( $65\pm 5^\circ\text{C}$ ). 3.  
12 Spray-dry, sift, and mix.

##### 13 **1.1.2 Glycyrrhiza uralensis Fisch. ex DC.**

14 Decoct the pieces with water twice, first for 2.5 hours and second for 1.5 hour. 2. Combine the  
15 decoctions, filter, and concentrate the filtrate to a clear paste with a relative density of 1.09 to 1.11  
16 ( $65\pm 5^\circ\text{C}$ ). 3. Spray-dry, sift, and mix.

##### 17 **1.1.3 Astragalus mongholicus Bunge**

18 Decoct the pieces with water twice, first for 2 hours and second for 1 hour. 2. Combine the decoctions,  
19 filter, and concentrate the filtrate to a clear paste with a relative density of 1.11 to 1.13 ( $65\pm 5^\circ\text{C}$ ). 3.  
20 Spray-dry, sift, and mix.

##### 21 **1.1.4 Atractylodes macrocephala Koidz.**

22 Decoct the pieces with water twice, first for 2 hours and second for 1 hour. 2. Combine the decoctions,  
23 filter, and concentrate the filtrate to a clear paste with a relative density of 1.09 to 1.11 ( $65\pm 5^\circ\text{C}$ ). 3.  
24 Spray-dry, sift, and mix.

25 **1.1.5 *Hansenia weberbaueriana* (Fedde ex H.Wolff) Pimenov & Kljuykov**

26 Decoct the pieces with water twice, first for 2 hours and second for 1 hour. 2. Combine the decoctions,  
27 filter, and concentrate the filtrate to a clear paste with a relative density of 1.10 to 1.12 (65±5°C). 3.  
28 Spray-dry, sift, and mix

29 **1.1.6 *Actaea heracleifolia* (Kom.) J.Compton**

30 Decoct the pieces with water for 2.5 hours. 2. Filter and concentrate the filtrate to a clear paste with a  
31 relative density of 1.08 to 1.10 (65±5°C). 3. Spray-dry, sift, and mix

32 **1.1.7 *Codonopsis pilosula* (Franch.) Nannf.**

33 Decoct the pieces with water twice, first for 1.5 hours and second for 0.5 hour. 2. Combine the  
34 decoctions, filter, and concentrate the filtrate to a clear paste with a relative density of 1.03 to 1.05  
35 (65±5°C). 3. Spray-dry, sift, and mix

36 **1.1.8 *Scutellaria baicalensis* Georgi**

37 Decoct the pieces with water twice, first for 1 hour and second for 1 hour. 2. Combine the decoctions,  
38 filter, and concentrate the filtrate to a clear paste with a relative density of 1.15 to 1.17 (65±5°C). 3.  
39 Spray-dry, sift, and mix

40 **1.1.9 *Coptis chinensis* Franch.**

41 Decoct the pieces with water twice, first for 1 hour and second for 1 hour. 2. Combine the decoctions,  
42 filter, and concentrate the filtrate to a clear paste with a relative density of 1.09 to 1.11 (65±5°C). 3.  
43 Spray-dry, sift, and mix

44 **1.1.10 *Pothos chinensis* (Raf.) Merr.**

45 Decoct the pieces with water for 3 hours. 2. Filter and concentrate the filtrate to a clear paste with a  
46 relative density of 1.10 to 1.11 (65±5°C). 3. Spray-dry, sift, and mix

47 **1.2 The CSQBD herbal formula**

48 The CSQBD herbal formula is composed of 8 different herbs, as detailed in Supplementary Table S2.  
49 The primary components of each herb were extracted following the specified processing procedures  
50 outlined below. Subsequently, these ten extracts were thoroughly mixed for 30 minutes to achieve  
51 uniformity. The homogenized mixture was then granulated to produce granules with a size range of  
52 12-40 mesh. Finally, the granules were packaged into four aluminum foil bags.

53 **1.2.1 Astragalus mongholicus Bunge**

54 Decoct the pieces with water twice, first for 2 hours and second for 1 hour. 2. Combine the decoctions,  
55 filter, and concentrate the filtrate to a clear paste with a relative density of 1.11 to 1.13 (65±5°C). 3.  
56 Spray-dry, sift, and mix.

57 **1.2.2 Glycyrrhiza uralensis Fisch. ex DC.**

58 Decoct the pieces with water twice, first for 2.5 hours and second for 1.5 hour. 2. Combine the  
59 decoctions, filter, and concentrate the filtrate to a clear paste with a relative density of 1.09 to 1.11  
60 (65±5°C). 3. Spray-dry, sift, and mix.

61 **1.2.3 Codonopsis pilosula (Franch.) Nannf.**

62 Decoct the pieces with water twice, first for 1.5 hours and second for 0.5 hour. 2. Combine the  
63 decoctions, filter, and concentrate the filtrate to a clear paste with a relative density of 1.03 to 1.05  
64 (65±5°C). 3. Spray-dry, sift, and mix.

65 **1.2.4 Angelica sinensis (Oliv.) Diels**

66 Decoct the pieces with water for 2.5 hours. 2. Filter and concentrate the filtrate to a clear paste with a  
67 relative density of 1.07 to 1.09 (65±5°C). 3. Spray-dry, sift, and mix.

68 **1.2.5 Citrus reticulata Blanco**

69 Decoct the pieces with water for 1 hours. 2. Filter and concentrate the filtrate to a clear paste with a  
70 relative density of 1.05 to 1.07 (65±5°C). 3. Spray-dry, sift, and mix.

71 **1.2.6 Actaea heracleifolia (Kom.) J.Compton**

72 Decoct the pieces with water for 2.5 hours. 2. Filter and concentrate the filtrate to a clear paste with a  
73 relative density of 1.08 to 1.10 (65±5°C). 3. Spray-dry, sift, and mix.

74 **1.2.7 Bupleurum chinense DC.**

75 Decoct the pieces with water twice, first for 2 hours and second for 1 hour. 2. Combine the decoctions,  
76 filter, and concentrate the filtrate to a clear paste with a relative density of 1.10 to 1.12 (65±5°C). 3.  
77 Spray-dry, sift, and mix.

78 **1.2.8 Atractylodes macrocephala Koidz.**

79 Decoct the pieces with water twice, first for 1.5 hours and second for 1 hour. 2. Combine the decoctions,  
80 filter, and concentrate the filtrate to a clear paste with a relative density of 1.05 to 1.07 (65±5°C). 3.  
81 Spray-dry, sift, and mix.

82 **1.3 Detection of the main chemicals in the two herbal formulas**

83 The samples were dissolved in hot water and then extracted once with an equal volume of butyl alcohol.  
84 The butyl alcohol fraction was concentrated until dry, and subsequently dissolved in methanol. This  
85 methanol solution was then filtered through 0.22  $\mu\text{m}$  micropore filter for further analysis.

86 High Performance Liquid chromatography (HPLC) was performed using an Accela system  
87 (Thermo Scientific, USA). The chromatographic separation was conducted on an Agilent Eclipse Plus  
88 C18 column (4.6 mm  $\times$  100 mm, 2.7  $\mu\text{m}$ ). The mobile phase consisted of 0.05% formic acid solution  
89 (A) and acetonitrile (B). The gradient elution program was set as follows: 0 min, A:B 90:10; 15 min,  
90 A:B 75:25; 40 min, A:B 60:40; 55 min, A:B 30:70; 56 min, A:B 90:10; 60 min, A:B 95:5. The flow  
91 rate was 0.3 mL/min and the injection volume was 2  $\mu\text{L}$ .

92 LC-MS analysis was performed on LTQ-Orbitrap XL Mass Spectrometer (Thermo Scientific,  
93 USA) equipped with an ESI source in negative ionization mode. The capillary temperature was set at  
94 350°C. Sheath, auxiliary, and sweep gas flow rates were set at 30, 4, and 0 units, respectively. Source  
95 voltage was set at 3.8 kV, capillary voltage at -18 V, and tube lens voltage at -67 V. The data evaluation  
96 was performed with Xcalibur 2.0 software. A Collision-Induced Dissociation (CID) energy of 35 eV  
97 was used in a data dependent scan mode in MS/MS analysis.

98

99 2 Supplementary Figures and Supplementary Tables

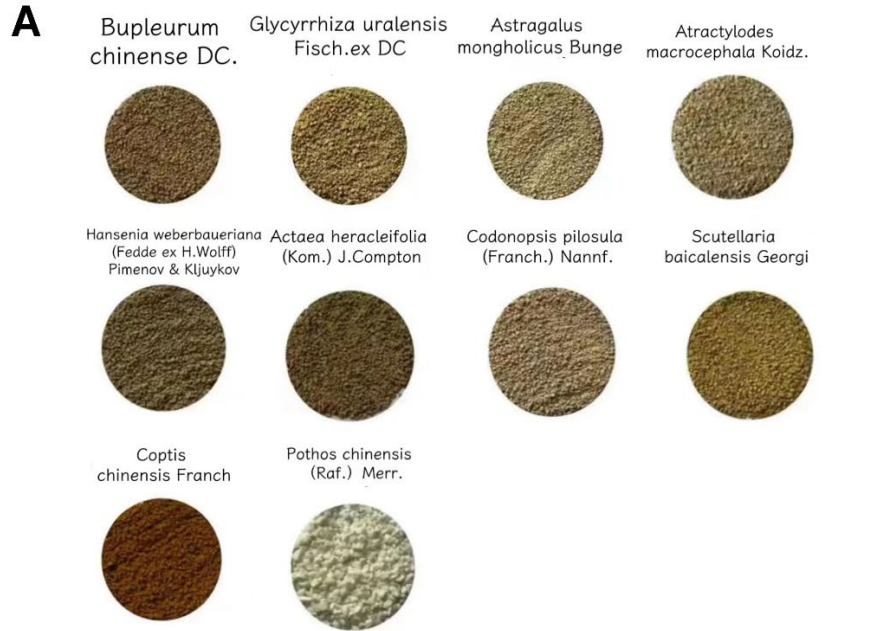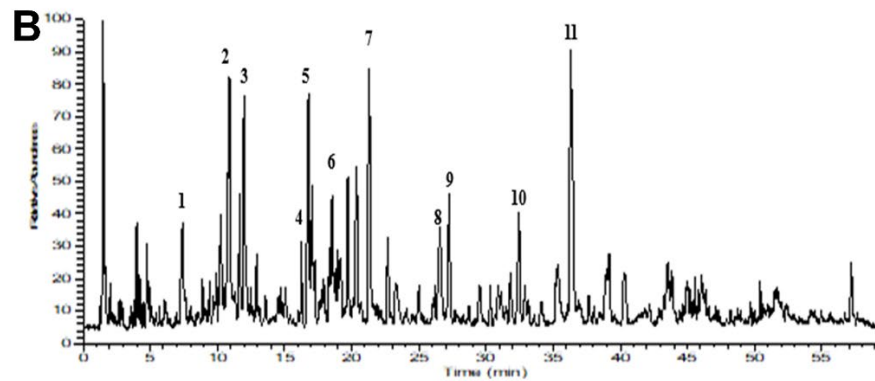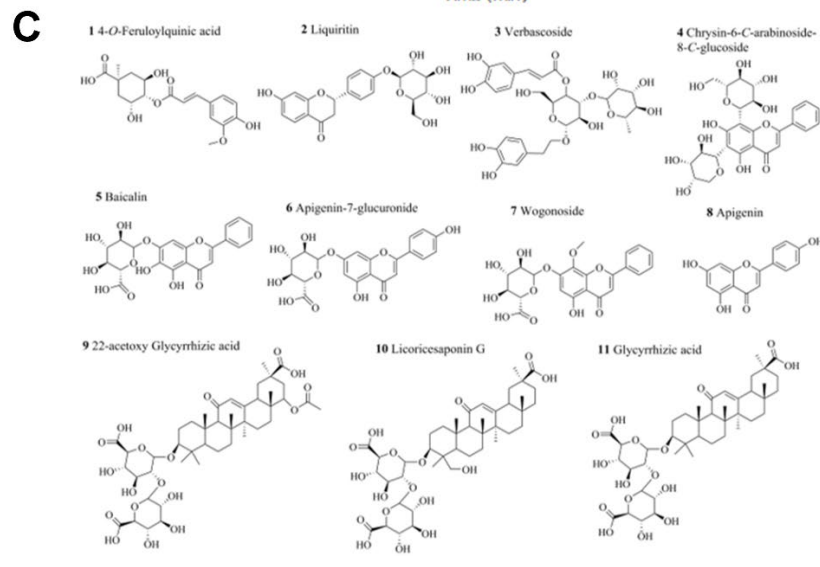

101 Supplementary Figure S1. The STYHCD herbal formula. (a) Photos of the decocting-free granules of  
 102 the ten herbs in the STYHCD herbal formula. (b) HPLC-TIC-MS finger-printing of STYHCD herbal  
 103 formula. (c) The eleven main chemicals in STYHCD.

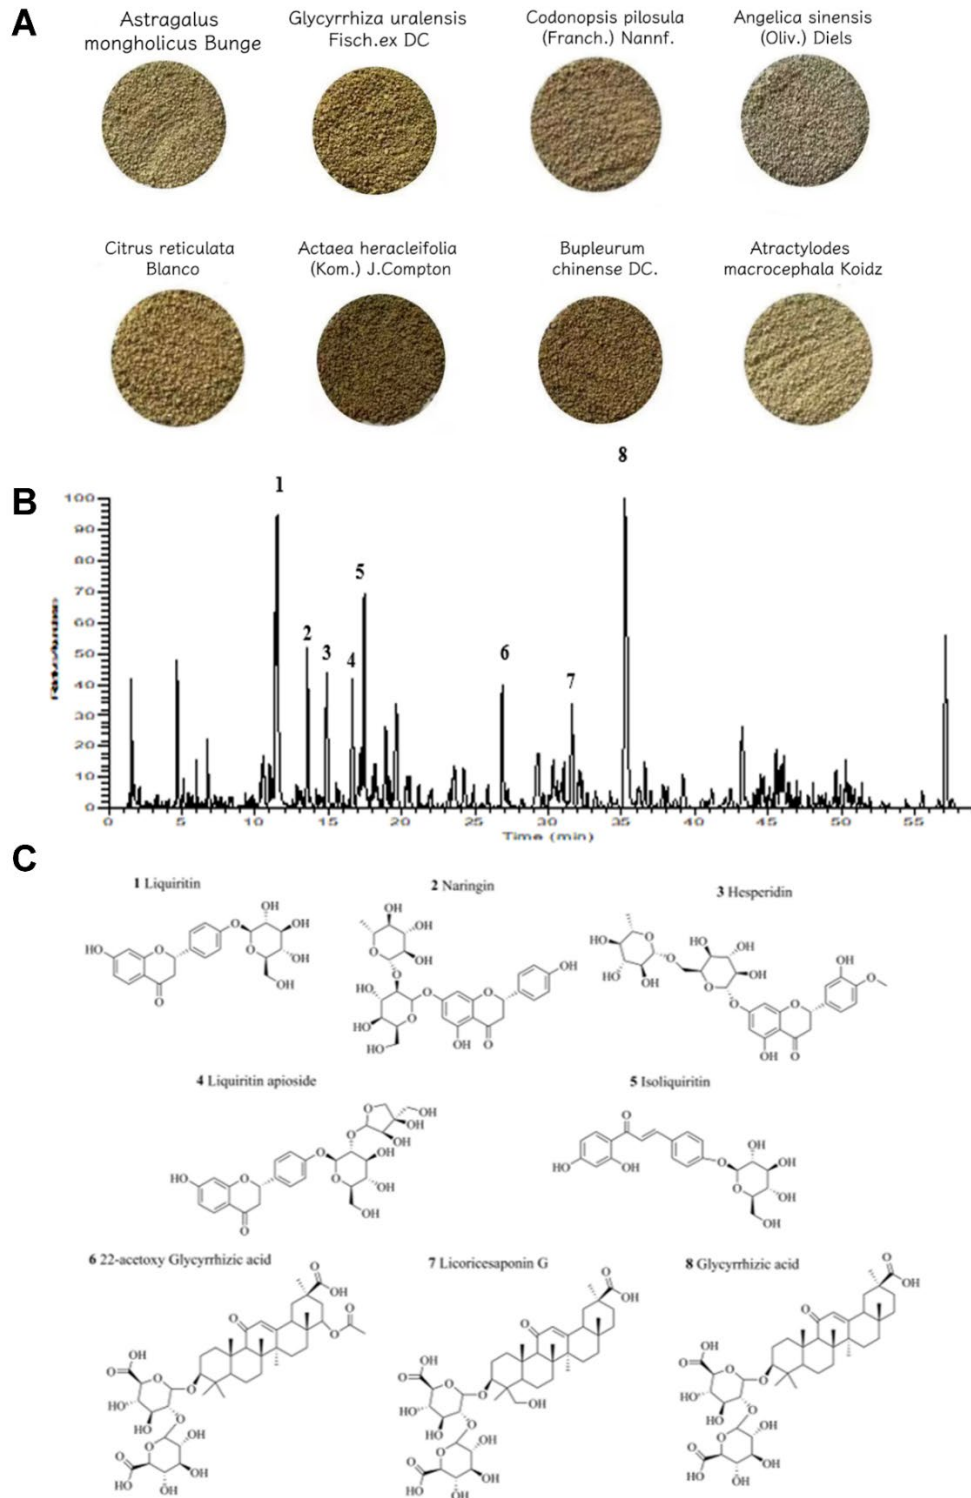

105 Supplementary Figure S2. The CSQBD herbal formula. (a) Photos of the decocting-free granules of  
 106 the eight herbs in the CSQBD herbal formula. (b) HPLC-TIC-MS finger-printing of CSQBD herbal  
 107 formula. (c) The eight main chemicals in CSQBD. STYHCD, spleen-tonifying and yin heat-clearing  
 108 decoction; CSQBD, center-supplementing and qi-boosting decoction.

109

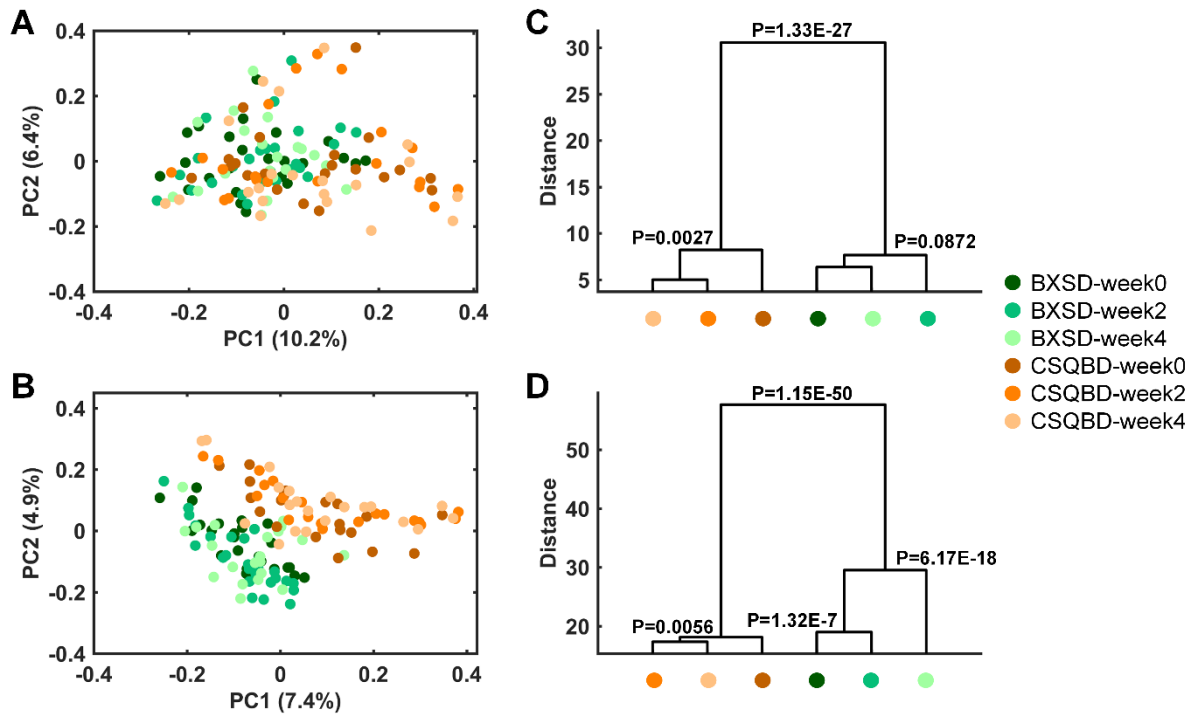

110

111 Supplementary Figure S3. The temporal alteration of the gut microbiome in insomnia patients received  
 112 two different herbal formula treatments over time. Principal coordinate analysis based on (A) Bray-  
 113 Curtis dissimilarity distance and (B) Jaccard distance. Clustering of gut microbiota based on inter-  
 114 group distances obtained through MANOVA test based on (C) Bray-Curtis dissimilarity distance and  
 115 (D) Jaccard distance.

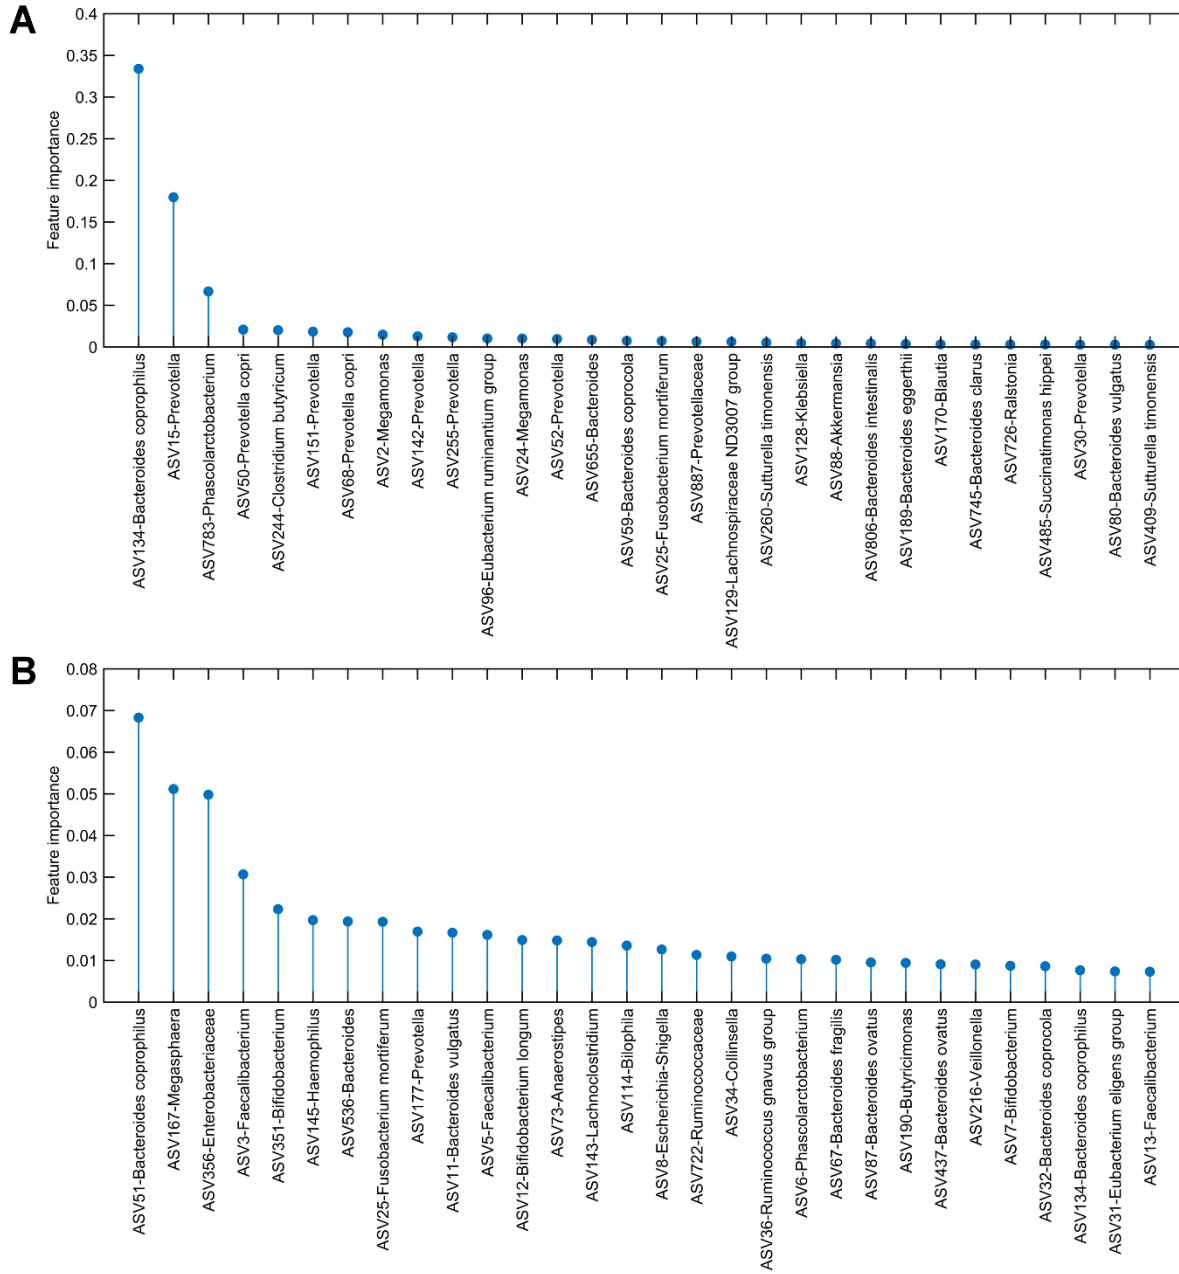

116

117 Supplementary Figure S4. Feature importance of the top 30 gut microbial species identified through  
 118 nested 10-fold cross-validated random forest regression for each herbal formula. A. STYHCD, Spleen-  
 119 Tonifying and Yin Heat-Clearing Decoction. B. CSQBD, Center-Supplementing, and Qi-Boosting  
 120 Decoction.

121



122

123 Supplementary Table S1. Herbal ingredients of the Spleen-Tonifying and Yin Heat-Clearing  
124 Decoction.

| Herb                                                                  | Weight of the herb (g) | Herbal decocting-free granule (g) |
|-----------------------------------------------------------------------|------------------------|-----------------------------------|
| <i>Bupleurum Chinese</i> DC.                                          | 15                     | 3.9                               |
| <i>Glycyrrhiza uralensis</i> Fisch. ex DC.                            | 10                     | 4.3                               |
| <i>Astragalus mongholicus</i> Bunge                                   | 10                     | 3.7                               |
| <i>Atractylodes macrocephala</i> Koidz.                               | 10                     | 5.8                               |
| <i>Hansenia weberbaueriana</i> (Fedde ex H. Wolff) Pimenov & Kljuykov | 10                     | 2.5                               |
| <i>Actaea heracleifolia</i> (Kom.) J. Compton                         | 5                      | 0.7                               |
| <i>Codonopsis pilosula</i> (Franch.) Nannf.                           | 5                      | 4.9                               |
| <i>Scutellaria baicalensis</i> Georgi                                 | 5                      | 1.9                               |
| <i>Coptis chinensis</i> Franch.                                       | 5                      | 0.9                               |
| <i>Gypsum fibrosum</i>                                                | 5                      | 1                                 |
| Total weight                                                          | 80                     | 29.6                              |

125

126 Supplementary Table S2. Herbal ingredients of the Center-Supplementing, and Qi-Boosting  
127 Decoction.

| Herb                                          | Weight of the herb (g) | Herbal decocting-free granule (g) |
|-----------------------------------------------|------------------------|-----------------------------------|
| <i>Astragalus mongholicus</i> Bunge           | 30                     | 10                                |
| <i>Glycyrrhiza uralensis</i> Fisch. ex DC     | 15                     | 5.8                               |
| <i>Atractylodes macrocephala</i> Koidz.       | 15                     | 9.5                               |
| <i>Codonopsis pilosula</i> (Franch.) Nannf.   | 10                     | 8.9                               |
| <i>Angelica sinensis</i> (Oliv.) Diels        | 10                     | 6.4                               |
| <i>Citrus reticulata</i> Blanco               | 10                     | 3.7                               |
| <i>Actaea heracleifolia</i> (Kom.) J. Compton | 10                     | 1.3                               |
| <i>Bupleurum chinense</i> DC.                 | 10                     | 2.3                               |
| Total weight                                  | 110                    | 47.9                              |

128

129 Supplementary Table S3. Baseline alpha-diversity for the insomnia patients with different TCM  
130 symptoms.

| alpha-diversity metric | Coefficient | SEM      | p-value | FDR_BH |
|------------------------|-------------|----------|---------|--------|
| shannon_entropy        | 0.0011      | 0.0004   | 0.0072  | 0.0249 |
| pielou_evenness        | 0.0002      | 6.76E-05 | 0.0083  | 0.0249 |
| chao1                  | -0.0006     | 0.0013   | 0.6654  | 0.9489 |
| observed_features      | -0.0003     | 0.0012   | 0.7907  | 0.9489 |
| menhinick              | 1.41E-05    | 4.20E-05 | 0.7390  | 0.9489 |
| margalef               | -7.86E-06   | 0.0002   | 0.9662  | 0.9662 |

131 STYHCD group was used as the reference.

132 FDR\_BH, FDR-corrected p-value were obtained with the Benjamini-Hochberg method to adjust for  
133 multiple comparisons.

134

135 Supplementary Table S4. Longitudinal effects of the two herbal formulas on stress and systematic  
136 inflammation over time.

| Treatment | Cytokine              | Coefficient | SEM    | p-value | FDR_BH |
|-----------|-----------------------|-------------|--------|---------|--------|
| STYHCD    | Cortisol (ng/mL)      | 0.0194      | 0.0477 | 0.6876  | 0.8251 |
|           | IL-1 $\beta$ (pg/mL)  | 0.1909      | 0.0642 | 0.0064  | 0.0166 |
|           | IL-6 (pg/mL)          | 0.1435      | 0.0364 | 0.0008  | 0.0037 |
|           | TNF- $\alpha$ (pg/mL) | 0.2013      | 0.0615 | 0.0033  | 0.0098 |
|           | IFN- $\alpha$ (pg/mL) | -0.0846     | 0.0721 | 0.2471  | 0.3706 |
|           | IL-10 (pg/mL)         | 0.1291      | 0.0456 | 0.0102  | 0.0229 |
|           | TNF- $\beta$ (pg/mL)  | 0.0186      | 0.0741 | 0.8026  | 0.8498 |
| CSQBD     | Cortisol (ng/mL)      | -0.1372     | 0.0760 | 0.0788  | 0.1772 |
|           | IL-1 $\beta$ (pg/mL)  | -0.0419     | 0.0779 | 0.5965  | 0.6316 |
|           | IL-6 (pg/mL)          | 0.1026      | 0.0725 | 0.1730  | 0.3115 |
|           | TNF- $\alpha$ (pg/mL) | 0.0688      | 0.0794 | 0.3914  | 0.5419 |
|           | IFN- $\alpha$ (pg/mL) | -0.1606     | 0.0748 | 0.0381  | 0.1142 |
|           | IL-10 (pg/mL)         | 0.2042      | 0.0730 | 0.0081  | 0.0362 |
|           | TNF- $\beta$ (pg/mL)  | -0.0655     | 0.0816 | 0.4278  | 0.5500 |

137 FDR\_BH, FDR-corrected p-value were obtained with the Benjamini-Hochberg method to adjust for  
138 multiple comparisons.

139 STYHCD, spleen-tonifying and yin heat-clearing decoction; CSQBD, center-supplementing and qi-  
140 boosting decoction.

141

142 Supplementary Table S5. Longitudinal effects of the two herbal formulas on the alpha-diversity of the  
143 gut microbiome over time.

| Treatment | alpha-diversity metric | Coefficient | SEM      | p-value | FDR_BH |
|-----------|------------------------|-------------|----------|---------|--------|
| STYHCD    | shannon_entropy        | -1.64E-04   | 1.35E-04 | 0.2270  | 0.5537 |
|           | pielou_evenness        | -3.12E-05   | 2.01E-05 | 0.1247  | 0.5537 |
|           | chao1                  | 6.31E-04    | 6.54E-04 | 0.3374  | 0.5537 |
|           | observed_features      | -5.51E-04   | 6.09E-04 | 0.3691  | 0.5537 |
|           | menhinick              | 2.09E-05    | 3.16E-05 | 0.5104  | 0.6125 |
|           | margalef               | 1.43E-05    | 1.20E-04 | 0.9055  | 0.9055 |
| CSQBD     | shannon_entropy        | 3.85E-04    | 3.00E-04 | 0.2040  | 0.6120 |
|           | pielou_evenness        | 6.77E-05    | 5.09E-05 | 0.1887  | 0.6120 |
|           | chao1                  | -1.17E-04   | 5.45E-04 | 0.8302  | 0.8302 |
|           | observed_features      | -1.52E-04   | 5.02E-04 | 0.7623  | 0.8302 |
|           | margalef               | -4.56E-05   | 8.63E-05 | 0.5994  | 0.8302 |
|           | menhinick              | -4.52E-06   | 2.04E-05 | 0.8257  | 0.8302 |

144 FDR\_BH, FDR-corrected p-value were obtained with the Benjamini-Hochberg method to adjust for  
145 multiple comparisons.

146 STYHCD, spleen-tonifying and yin heat-clearing decoction; CSQBD, center-supplementing and qi-  
147 boosting decoction.
